# Supplementary material
Source: PubMed Central journal article supplement (PMC8641428)
Supplement: mmc1.pdf [file mmc1.pdf]

## 中国中医科学院医学伦理委员会审查批件

批件号：中国中医科学院医学伦理委员会 CACMS-IRB2020-001-1

|                                                                                                                                                                                                                                                                                                                                                                                                                                                                                                                                                                                                    |                                                                                                          |      |          |
|----------------------------------------------------------------------------------------------------------------------------------------------------------------------------------------------------------------------------------------------------------------------------------------------------------------------------------------------------------------------------------------------------------------------------------------------------------------------------------------------------------------------------------------------------------------------------------------------------|----------------------------------------------------------------------------------------------------------|------|----------|
| 项目名称                                                                                                                                                                                                                                                                                                                                                                                                                                                                                                                                                                                               | 中医药治疗新型冠状病毒肺炎临床对照研究                                                                                      |      |          |
| 项目来源                                                                                                                                                                                                                                                                                                                                                                                                                                                                                                                                                                                               | 国家重点研发计划“公共安全风险防控与应急技术装备”重点专项                                                                            |      |          |
| 项目编号                                                                                                                                                                                                                                                                                                                                                                                                                                                                                                                                                                                               | 2020YFC0841500                                                                                           |      |          |
| 研究单位                                                                                                                                                                                                                                                                                                                                                                                                                                                                                                                                                                                               | 中国中医科学院                                                                                                  |      |          |
| 项目负责人                                                                                                                                                                                                                                                                                                                                                                                                                                                                                                                                                                                              | 黄璐琦                                                                                                      |      |          |
| 主要研究者                                                                                                                                                                                                                                                                                                                                                                                                                                                                                                                                                                                              | 阮连国                                                                                                      |      |          |
| 审查类别                                                                                                                                                                                                                                                                                                                                                                                                                                                                                                                                                                                               | 初审                                                                                                       | 审查方式 | 紧急电话会议审查 |
| 审查地点                                                                                                                                                                                                                                                                                                                                                                                                                                                                                                                                                                                               | 电话会议                                                                                                     |      |          |
| 批准文件                                                                                                                                                                                                                                                                                                                                                                                                                                                                                                                                                                                               | 研究方案：版本号： <u>V1.3</u> ；版本日期： <u>2020-01-28</u><br>知情同意书：版本号： <u>V1.1</u> ；版本日期： <u>2020-01-28</u>        |      |          |
| 审查文件                                                                                                                                                                                                                                                                                                                                                                                                                                                                                                                                                                                               | 1. 初审申请<br>2. 临床研究方案（版本号： <u>V1.3</u> ，版本日期：2020年01月28日）<br>3. 知情同意书（版本号： <u>V1.1</u> ，版本日期：2020年01月28日） |      |          |
| <b>审查意见</b>                                                                                                                                                                                                                                                                                                                                                                                                                                                                                                                                                                                        |                                                                                                          |      |          |
| <p>根据国家卫生和计划生育委员会《涉及人的生物医学研究伦理审查办法》(2016)，国家食品药品监督管理总局《药物临床试验质量管理规范》(2003)、《药物临床试验伦理审查工作指导原则》(2010)、《医疗器械临床试验质量管理规范》(2016)，国家中医药管理局《中医药临床研究伦理审查管理规范》(2010)，WMA《赫尔辛基宣言》和 CIOMS《人体生物医学研究国际道德指南》的伦理原则，经本伦理委员会审查，同意按所批准的临床研究方案、知情同意书开展本项研究。</p> <p>请遵循 GCP 原则、遵循伦理委员会批准的方案开展临床研究，保护受试者的健康与权利。</p> <p>研究开始前，请申请人完成临床试验注册。</p> <p>研究过程中若变更主要研究者，对临床研究方案、知情同意书等的任何修改，请申请人提交修正案审查申请。</p> <p>发生严重不良事件，请申请人及时提交严重不良事件报告。</p> <p>请按照伦理委员会规定的年度/定期审查频率，申请人在截止日期前 1 个月提交研究进展报告；申办者应当向组长单位伦理委员会提交各中心研究进展的汇总报告；当出现任何可能显著影响试验进行、或增加受试者危险的情况时，请申请人及时向伦理委员会提交书面报告。</p> <p>研究纳入了不符合纳入标准或符合排除标准的受试者，符合中止试验规定而未让受试者</p> |                                                                                                          |      |          |
