# Supplementary material
Source: PubMed Central journal article supplement (PMC8641428)

退出研究, 给予错误治疗或剂量, 给予方案禁止的合并用药等没有遵从方案开展研究的情况; 或可能对受试者的权益/健康、以及研究的科学性造成不良影响等违背 GCP 原则的情况, 请申办者/监查员/研究者提交违背方案报告。

申请人暂停或提前终止临床研究, 请及时提交暂停/终止研究报告。

完成临床研究, 请申请人提交研究完成报告, 以及概述研究发现和结论的总结报告。

|            |                                                                                               |
|------------|-----------------------------------------------------------------------------------------------|
| 年度/定期审查频率  | 6 个月                                                                                          |
| 下次跟踪审查截止日期 | 请于 2020-07-31 前提交研究进展报告                                                                       |
| 有效期        | 2020-01-28 ~ 2020-07-31                                                                       |
| 联系人与联系电话   | 霍蕊莉 010-64089838                                                                              |
| 主任委员签字     |  2020. 1. 28 |
| 伦理委员会      | 中国中医科学院医学伦理委员会 (中国中医科学院科研处代章)                                                                 |
| 日期         | 2020 年 01 月 28 日                                                                              |

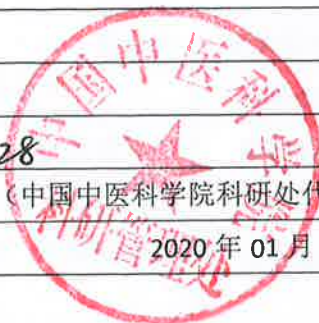

Supplement: mmc2.pdf [file mmc2.pdf]
